# Supplementary material for: A safe and potent anti-CD19 CAR T cell therapy
Source: Springer Nature journal article supplement (doi:10.1038/s41591-019-0421-7), 2019-04-22
Supplement: 41591_2019_421_MOESM2_ESM.pdf [file 41591_2019_421_MOESM2_ESM.pdf]

## Reporting Summary

Nature Research wishes to improve the reproducibility of the work that we publish. This form provides structure for consistency and transparency in reporting. For further information on Nature Research policies, see [Authors & Referees](#) and the [Editorial Policy Checklist](#).

### Statistical parameters

When statistical analyses are reported, confirm that the following items are present in the relevant location (e.g. figure legend, table legend, main text, or Methods section).

n/a Confirmed

- The exact sample size ( $n$ ) for each experimental group/condition, given as a discrete number and unit of measurement
- An indication of whether measurements were taken from distinct samples or whether the same sample was measured repeatedly
- The statistical test(s) used AND whether they are one- or two-sided  
*Only common tests should be described solely by name; describe more complex techniques in the Methods section.*
- A description of all covariates tested
- A description of any assumptions or corrections, such as tests of normality and adjustment for multiple comparisons
- A full description of the statistics including central tendency (e.g. means) or other basic estimates (e.g. regression coefficient) AND variation (e.g. standard deviation) or associated estimates of uncertainty (e.g. confidence intervals)
- For null hypothesis testing, the test statistic (e.g.  $F$ ,  $t$ ,  $r$ ) with confidence intervals, effect sizes, degrees of freedom and  $P$  value noted  
*Give  $P$  values as exact values whenever suitable.*
- For Bayesian analysis, information on the choice of priors and Markov chain Monte Carlo settings
- For hierarchical and complex designs, identification of the appropriate level for tests and full reporting of outcomes
- Estimates of effect sizes (e.g. Cohen's  $d$ , Pearson's  $r$ ), indicating how they were calculated
- Clearly defined error bars  
*State explicitly what error bars represent (e.g. SD, SE, CI)*

Our web collection on [statistics for biologists](#) may be useful.

### Software and code

Policy information about [availability of computer code](#)

Data collection

FACS Diva Software (BD BioScience)

Data analysis

FlowJo v10.2 (Tree Star Inc.), GraphPad Prism (GraphPad Software Inc.), Milliplex Analyte program

For manuscripts utilizing custom algorithms or software that are central to the research but not yet described in published literature, software must be made available to editors/reviewers upon request. We strongly encourage code deposition in a community repository (e.g. GitHub). See the Nature Research [guidelines for submitting code & software](#) for further information.

### Data

Policy information about [availability of data](#)

All manuscripts must include a [data availability statement](#). This statement should provide the following information, where applicable:

- Accession codes, unique identifiers, or web links for publicly available datasets
- A list of figures that have associated raw data
- A description of any restrictions on data availability

The data that support the findings of this study will be available from the corresponding authors upon reasonable request

## Field-specific reporting

Please select the best fit for your research. If you are not sure, read the appropriate sections before making your selection.

Life sciences  Behavioural & social sciences  Ecological, evolutionary & environmental sciences

For a reference copy of the document with all sections, see [nature.com/authors/policies/ReportingSummary-flat.pdf](https://www.nature.com/authors/policies/ReportingSummary-flat.pdf)

## Life sciences study design

All studies must disclose on these points even when the disclosure is negative.

|                 |                                                                                                            |
|-----------------|------------------------------------------------------------------------------------------------------------|
| Sample size     | In this phase I clinical trial, 25 patients were enrolled based upon the inclusion and exclusion criteria. |
| Data exclusions | No data was excluded from the analysis                                                                     |
| Replication     | All attempts at replication of the pre-clinical experiments were successful                                |
| Randomization   | This phase I trial is not randomized.                                                                      |
| Blinding        | Blinding is not possible for this phase I trial                                                            |

## Reporting for specific materials, systems and methods

### Materials & experimental systems

|                                     |                                                                 |
|-------------------------------------|-----------------------------------------------------------------|
| n/a                                 | Included in the study                                           |
| <input checked="" type="checkbox"/> | <input type="checkbox"/> Unique biological materials            |
| <input type="checkbox"/>            | <input checked="" type="checkbox"/> Antibodies                  |
| <input type="checkbox"/>            | <input checked="" type="checkbox"/> Eukaryotic cell lines       |
| <input checked="" type="checkbox"/> | <input type="checkbox"/> Palaeontology                          |
| <input type="checkbox"/>            | <input checked="" type="checkbox"/> Animals and other organisms |
| <input type="checkbox"/>            | <input checked="" type="checkbox"/> Human research participants |

### Methods

|                                     |                                                    |
|-------------------------------------|----------------------------------------------------|
| n/a                                 | Included in the study                              |
| <input checked="" type="checkbox"/> | <input type="checkbox"/> ChIP-seq                  |
| <input type="checkbox"/>            | <input checked="" type="checkbox"/> Flow cytometry |
| <input checked="" type="checkbox"/> | <input type="checkbox"/> MRI-based neuroimaging    |

## Antibodies

### Antibodies used

| Antibody name                                | Clone    | Catalog No.  | Vendor            |
|----------------------------------------------|----------|--------------|-------------------|
| Anti-EGFR                                    | C225     | Ab00279-10.0 | Absolute antibody |
| FITC anti-human CD3                          | UCHT1    | 300406       | BioLegend         |
| PERCP anti-human CD4                         | RPA-T4   | 300528       | BioLegend         |
| PE/Cy7 anti-human CD8a                       | RPA-T8   | 301012       | BioLegend         |
| APC anti-human CD279(PD-1)                   | EH12.2H7 | 329908       | BioLegend         |
| APC Mouse IgG2a,K isotype Ctrl(Fc)           | MOPC-21  | 400120       | BioLegend         |
| Brilliant Violet 421 anti-human CD45RA       | HI100    | 304130       | BioLegend         |
| Brilliant Violet 510 anti-human CD45RO       | UCHL1    | 304246       | BioLegend         |
| APC anti-human CD197(CCR7)                   | G043H7   | 353214       | BioLegend         |
| PE anti-human CD19                           | HIB19    | 302208       | BioLegend         |
| APC anti-human CD20                          | 2H7      | 302310       | BioLegend         |
| PE/Cy7 anti-human CD27 antibody              | M-T271   | 356411       | BioLegend         |
| Brilliant Violet 421 anti-human IgD antibody | IA6-2    | 348225       | BioLegend         |
| PE anti-human IgG Fc                         | HP6017   | 409304       | BioLegend         |
| Human Trustain                               | Fcx      | 422302       | BioLegend         |

### Validation

Certificates of analysis and validation statements are provided on manufacturer's websites

## Eukaryotic cell lines

Policy information about [cell lines](#)

### Cell line source(s)

293T, Nalm6, Raji, and K562 cell lines from ATCC

|                                                                      |                                                                                                                                                                                                                             |
|----------------------------------------------------------------------|-----------------------------------------------------------------------------------------------------------------------------------------------------------------------------------------------------------------------------|
| Authentication                                                       | 293T cell line was authenticated by using NIST published 9 species-specific STR markers. The Nalm6 cell line was authenticated by HLA typing and verified to express CD19. K562 and Raji cell lines were not authenticated. |
| Mycoplasma contamination                                             | All cell lines have been tested negative for Mycoplasma spp.                                                                                                                                                                |
| Commonly misidentified lines<br>(See <a href="#">ICLAC</a> register) | None are among the ICLAC database of commonly misidentified cell lines.                                                                                                                                                     |

## Animals and other organisms

Policy information about [studies involving animals](#); [ARRIVE guidelines](#) recommended for reporting animal research

|                         |                                                                                                                                                                                                                                                                                                                                                               |
|-------------------------|---------------------------------------------------------------------------------------------------------------------------------------------------------------------------------------------------------------------------------------------------------------------------------------------------------------------------------------------------------------|
| Laboratory animals      | 5-8 week-old female C.B.lgh-1b/GbmsTac-PrkdcscidLystbgN7 (SCID-beige) mice (Taconic)                                                                                                                                                                                                                                                                          |
| Wild animals            | <i>Provide details on animals observed in or captured in the field; report species, sex and age where possible. Describe how animals were caught and transported and what happened to captive animals after the study (if killed, explain why and describe method; if released, say where and when) OR state that the study did not involve wild animals.</i> |
| Field-collected samples | <i>For laboratory work with field-collected samples, describe all relevant parameters such as housing, maintenance, temperature, photoperiod and end-of-experiment protocol OR state that the study did not involve samples collected from the field.</i>                                                                                                     |

## Human research participants

Policy information about [studies involving human research participants](#)

|                            |                                                                                                                                                                                                                                                                                                                                                                                                                                                                                                                                                                                                                                                                                                                                                                                                                                                                                                                                                                                                               |
|----------------------------|---------------------------------------------------------------------------------------------------------------------------------------------------------------------------------------------------------------------------------------------------------------------------------------------------------------------------------------------------------------------------------------------------------------------------------------------------------------------------------------------------------------------------------------------------------------------------------------------------------------------------------------------------------------------------------------------------------------------------------------------------------------------------------------------------------------------------------------------------------------------------------------------------------------------------------------------------------------------------------------------------------------|
| Population characteristics | Population characteristics in this phase I trial provided in Table 1.<br>The median age of the patients was 48 (range: 24-76). Twelve patients were female and 13 were male. Eighteen patients (72%) had refractory or relapsed diffuse large B-cell lymphoma (DLBCL), including 13 patients with nongerminal center B-cell-like (non-GCB) DLBCL, 3 patients with GCB DLBCL based on the Hans algorithm, one patient with double-hit lymphoma (BZ011), and one patient with DLBCL transformed from follicular lymphoma (FL) (BZ017). Seven patients (28%) had refractory FL including 4 patients with grade 2 FL and 3 patients with grade 3a FL. The patients had all received extensive prior treatment. The median number of prior treatments was 3 (range: 1-6). Six patients relapsed after autologous stem cell transplantation (ASCT), one patient experienced tandem ASCT. At enrollment, three patients had International Prognostic Index (IPI) scores of 4 and seven patients had IPI scores of 3. |
| Recruitment                | 25 patients were enrolled based upon the inclusion and exclusion criteria in this phase I clinical trial. There was no potential self-selection bias in recruiting patients.                                                                                                                                                                                                                                                                                                                                                                                                                                                                                                                                                                                                                                                                                                                                                                                                                                  |

## Flow Cytometry

### Plots

Confirm that:

- The axis labels state the marker and fluorochrome used (e.g. CD4-FITC).
- The axis scales are clearly visible. Include numbers along axes only for bottom left plot of group (a 'group' is an analysis of identical markers).
- All plots are contour plots with outliers or pseudocolor plots.
- A numerical value for number of cells or percentage (with statistics) is provided.

### Methodology

|                           |                                                                                                                                                                                                                          |
|---------------------------|--------------------------------------------------------------------------------------------------------------------------------------------------------------------------------------------------------------------------|
| Sample preparation        | Human blood processing in GMP-compliant facility or research lab.                                                                                                                                                        |
| Instrument                | The BD FACSCalibur™ flow cytometer (BD Biosciences)                                                                                                                                                                      |
| Software                  | FACS Diva Software version 8.0.1 (BD Biosciences), FlowJo v10.2 (Tree Star Inc.)                                                                                                                                         |
| Cell population abundance | N/A                                                                                                                                                                                                                      |
| Gating strategy           | FSC-A/FSC-H plots were used to determine singlet gates. FSC-A/SSC-A plots were used to determine cell population gates. Isotype controls were used to indicate the boundaries between positive and negative populations. |

- Tick this box to confirm that a figure exemplifying the gating strategy is provided in the Supplementary Information.
