# Supplementary material for: A safe and potent anti-CD19 CAR T cell therapy
Source: Springer Nature journal article supplement (doi:10.1038/s41591-019-0421-7), 2019-04-22
Supplement: 41591_2019_421_MOESM4_ESM.pdf [file 41591_2019_421_MOESM4_ESM.pdf]

**Source Data Fig. 2. CD19-BBz(75) DNA and amino acid sequences**

**DNA seq.**

5'-

ATGCTTCTCCTGGTGACAAGCCTTCTGCTCTGTGAGTTACCACACCCAGCATTCCTCCTG  
ATCCCAGACATCCAGATGACACAGACTACATCCTCCCTGTCTGCCTCTCTGGGAGACAGA  
GTCACCATCAGTTGCAGGGCAAGTCAGGACATTAGTAAATATTTAAATTGGTATCAGCA  
GAAACCAGATGGAAGTGTAAACTCCTGATCTACCATACATCAAGATTACACTCAGGAGT  
CCCATCAAGTTTCAGTGGCAGTGGGTCTGGAACAGATTATTCTCTCACCATTAGCAACCT  
GGAGCAAGAAGATATTGCCACTTACTTTTGCCAACAGGGTAATACGCTTCCGTACACGTT  
CGGAGGGGGGACTAAGTTGGAAATAACAGGCTCCACCTCTGGATCCGGCAAGCCCGGATC  
TGGCGAGGGATCCACCAAGGGCGAGGTGAAACTGCAGGAGTCAGGACCTGGCCTGGTGGC  
GCCCTCACAGAGCCTGTCCGTACATGCACTGTCTCAGGGGTCTCATTACCCGACTATGG  
TGTAAGCTGGATTCGCCAGCCTCCACGAAAGGGTCTGGAGTGGCTGGGAGTAATATGGG  
GTAGTGAAACCACATACTATAATTCAGCTCTCAAATCCAGACTGACCATCATCAAGGACA  
ACTCCAAGAGCCAAGTTTTCTTAAAAATGAACAGTCTGCAAACCTGATGACACAGCCATTT  
ACTACTGTGCCAAACATTATTACTACGGTGGTAGCTATGCTATGGACTACTGGGGTCAAG  
GAACCTCAGTCACCGTCTCCTCAgctagcACCACGACGCCAGCGCCGCGACCACCAACACCG  
GCGCCACCATCGCGTCGCAGCCCCTGTCCCTGCGCCAGAGGCGTGCCGGCCAGCGGGCG  
GGGGCGCAGTGCACACGAGGGGGCTGGACTTCGCCTGTGATATCTACATCTGGGCGCCCT  
TGGCCGGGACTTGTGGGGTCTTCTCCTGTCACTGGTTATCACCCTTTACTGCAACCACA  
GGAACAAACGGGGCAGAAAGAAACTCCTGTATATATTCAAACAACCATTTATGAGACCA  
GTACAAACTACTCAAGAGGAAGATGGCTGTAGCTGCCGATTTCCAGAAGAAGAAGAAGG  
AGGATGTGAACTGAGAGTGAAGTTCAGCAGGAGCGCAGACGCCCCCGCTACCAGCAGGG  
CCAGAACCAGCTCTATAACGAGCTCAATCTAGGACGAAGAGAGGAGTACGATGTTTTGG  
ACAAGAGACGTGGCCGGGACCCTGAGATGGGGGAAAGCCGAGAAGGAAGAACCCTCAG  
GAAGGCCTGTACAATGAACTGCAGAAAGATAAGATGGCGGAGGCCTACAGTGAGATTGG  
GATGAAAGGCGAGCGCCGGAGGGGCAAGGGGCACGATGGCCTTACCAGGGTCTCAGTAC  
AGCCACCAAGGACACCTACGACGCCCTTACATGCAGGCCCTGCCCCCTCGCTAA

**Amino acid seq.**

MLLVTSLLLCELPHPAFLIPDIQMTQTTSSLSASLGDRVTISCRASQDISKYLNWYQQKP  
DGTVKLLIYHTSRLHSGVPSRFSGSGSDYSLTISNLEQEDIATYFCQQGNTLPYTFGGGT  
KLEITGSTSGSGKPGSGEGSTKGEVKLQESGGLVAPSQSLSVTCTVSGVSLPDYGVSWIRQ  
PPRKLEWLGVWIGSETTYNSALKSRLTIKDNSKSQVFLKMNSLQTDITAIYYCAKHYY  
YGGSYAMDYWGQTSVTVSSASTTTPAPRPPTPAPTIASQPLSLRPEACRPAAGGAVHTR  
GLDFACDIYIWAPLAGTCGVLLLSLVITLYCNHRNKRGRKLLYIFKQPFMRPVQTTQEED  
GCSCRFPEEEEGGCELRVKFSRSADAPAYQQGQNQLYNELNLGRREEYDVLDRRGRDPE  
MGGKPRRKNPQEGLYNELQKDKMAEAYSEIGMKGERRRRKGHDGLYQGLSTATKDTYD  
ALHMQUALPPR\*
