# Supplementary material for: A safe and potent anti-CD19 CAR T cell therapy
Source: Springer Nature journal article supplement (doi:10.1038/s41591-019-0421-7), 2019-04-22
Supplement: 41591_2019_421_MOESM5_ESM.pdf [file 41591_2019_421_MOESM5_ESM.pdf]

### Source Data Fig. 3. CD19-BBz(82) DNA and amino acid sequences

#### DNA seq.

5'-

ATGCTTCTCCTGGTGACAAGCCTTCTGCTCTGTGAGTTACCACACCCAGCATTCCTCCTG  
ATCCCAGACATCCAGATGACACAGACTACATCCTCCCTGTCTGCCTCTCTGGGAGACAGA  
GTCACCATCAGTTGCAGGGCAAGTCAGGACATTAGTAAATATTTAAATTGGTATCAGCA  
GAAACCAGATGGAAGTGTAAACTCCTGATCTACCATACATCAAGATTACACTCAGGAGT  
CCCATCAAGTTTCAAGTGGCAGTGGGTCTGGAACAGATTATTCTCTCACCATTAGCAACCT  
GGAGCAAGAAGATATTGCCACTTACTTTTGCCAACAGGGTAATACGCTTCCGTACACGTT  
CGGAGGGGGGACTAAGTTGGAAATAACAGGCTCCACCTCTGGATCCGGCAAGCCCGGATC  
TGGCGAGGGATCCACCAAGGGCGAGGTGAAACTGCAGGAGTCAGGACCTGGCCTGGTGGC  
GCCCTCACAGAGCCTGTCCGTACATGCACTGTCTCAGGGGTCTCATTACCCGACTATGG  
TGTAAGCTGGATTCGCCAGCCTCCACGAAAGGGTCTGGAGTGGCTGGGAGTAATATGGG  
GTAGTGAAACCACATACTATAATTCAGCTCTCAAATCCAGACTGACCATCATCAAGGACA  
ACTCCAAGAGCCAAGTTTTCTTAAAAATGAACAGTCTGCAAACCTGATGACACAGCCATTT  
ACTACTGTGCCAAACATTATTACTACGGTGGTAGCTATGCTATGGACTACTGGGGTCAAG  
GAACCTCAGTCACCGTCTCCTCAGCGGCCGATTTCGTGCCGGTCTTCCCTGCCAGCGAAGCC  
CACCACGACGCCAGCGCCGCGACCACCAACACCGGCGCCACCATCGCGTCGCAGCCCCTG  
TCCCTGCGCCAGAGGCGTGCCGGCCAGCGCGGGGGCGCAGTGCACACGAGGGGGCTG  
GACTTCGCCTGTGATATCTACATCTGGGCGCCCTTGCCGGGACTTGTGGGGTCCCTTCTC  
CTGTCACTGGTTATCACCTTTACTGCAAACGGGGCAGAAAGAAACTCCTGTATATATTC  
AAACAACCATTTATGAGACCAGTACAACTACTCAAGAGGAAGATGGCTGTAGCTGCCG  
ATTTCCAGAAGAAGAAGAAGGAGGATGTGAACTGAGAGTGAAGTTCAGCAGGAGCGCAG  
ACGCCCCCGGTACCAGCAGGGCCAGAACCAGCTCTATAACGAGCTCAATCTAGGACGAA  
GAGAGGAGTACGATGTTTTGGACAAGAGACGTGGCCGGGACCCTGAGATGGGGGAAAG  
CCGAGAAGGAAGAACCCTCAGGAAGGCCTGTACAATGAACTGCAGAAAGATAAGATGGC  
GGAGGCCTACAGTGAAGATTGGGATGAAAGGCGAGCGCCGGAGGGGCAAGGGGCACGATG  
GCCTTTACCAGGGTCTCAGTACAGCCACCAAGGACACCTACGACGCCCTTCACATGCAGG  
CCCTGCCCCCTCGCTAA

#### Amino acid seq.

MLLVTSLLLCELPHPAFLLIPDIQMTQTTSSLSASLGDRVTISCRASQDISKYLNWYQQKP  
DGTVKLLIYHTSRLHSGVPSRFSGSGSDTDYSLTISNLEQEDIATYFCQQGNTLPYTFGGGT  
KLEITGSTSGSKPGSGEGSTKGEVKLQESGGLVAPSQSLSVTCTVSGVSLPDYGVSWIRQ  
PPRKLEWLGVWIGSETTYYN SALKSRLTIHKDNSKSQVFLKMNSLQTD DTAIYYCAKHYY  
YGGSYAMDYWGQGTSVTVSSAAAFVFPVFLPAKPTTTPAPRPPTPAPTIASQPLSLRPEACR  
PAAGGAVHTRGLDFACDIYIWAPLAGTCGVLLLSLVITLYCKRGRKLLYIFKQPFMRPVQ  
TTQEEDGCSCRFP EEEEEGGCELRVKFSRSADAPAYQQGQNQLYNELNLRREEYDVLDR  
RGRDP EMGGKPRRKNPQ EGLYNELQKDKMAEAYSEIGMKGERRRGK GHDGLYQGLSTA  
TKD TYDALHMQALPPR\*
