# Supplementary material for: A safe and potent anti-CD19 CAR T cell therapy
Source: Springer Nature journal article supplement (doi:10.1038/s41591-019-0421-7), 2019-04-22
Supplement: 41591_2019_421_MOESM7_ESM.pdf [file 41591_2019_421_MOESM7_ESM.pdf]

**Source Data Fig. 5. CD19-BBz(96) DNA and amino acid sequences**

**DNA seq.**

5'-

ATGCTTCTCCTGGTGACAAGCCTTCTGCTCTGTGAGTTACCACACCCAGCATTCCTCCTG  
ATCCCAGACATCCAGATGACACAGACTACATCCTCCCTGTCTGCCTCTCTGGGAGACAGA  
GTCACCATCAGTTGCAGGGCAAGTCAGGACATTAGTAAATATTTAAATTGGTATCAGCA  
GAAACCAGATGGAAGTGTAAACTCCTGATCTACCATACATCAAGATTACACTCAGGAGT  
CCCATCAAGTTTCAAGTGGCAGTGGGTCTGGAACAGATTATTCTCTCACCATTAGCAACCT  
GGAGCAAGAAGATATTGCCACTTACTTTTGCCAACAGGGTAATACGCTTCCGTACACGTT  
CGGAGGGGGGACTAAGTTGGAAATAACAGGCTCCACCTCTGGATCCGGCAAGCCCGGATC  
TGGCGAGGGATCCACCAAGGGCGAGGTGAAACTGCAGGAGTCAGGACCTGGCCTGGTGGC  
GCCCTCACAGAGCCTGTCCGTCACATGCACTGTCTCAGGGGTCTCATTACCCGACTATGG  
TGTAAGCTGGATTCGCCAGCCTCCACGAAAGGGTCTGGAGTGGCTGGGAGTAATATGGG  
GTAGTGAAACCACATACTATAATTCAGCTCTCAAATCCAGACTGACCATCATCAAGGACA  
ACTCCAAGAGCCAAGTTTTCTTAAAAATGAACAGTCTGCAAACCTGATGACACAGCCATTT  
ACTACTGTGCCAAACATTATTACTACGGTGGTAGCTATGCTATGGACTACTGGGGTCAAG  
GAACCTCAGTCACCGTCTCCTCAGCGGCCGCActgagcaactccatcatgtacttcagccacTTCGTG  
CCGGTCTTCCTGCCAGCGAAGCCCACCACGACGCCAGCGCCGCGACCACCAACACCGGCGC  
CCACCATCGCGTTCGAGCCCTGTCCCTGCGCCCAGAGGCGTGC CGGCCAGCGGCGGGGGG  
CGCAGTGCACACGAGGGGGCTGGACTTCGCCTGTGATATCTACATCTGGGCGCCCTTGGC  
CGGACTTGTGGGGTCTTCTCCTGTCACTGGTTATCACCCCTTTACTGCAACCACAGGAA  
CAAACGGGGCAGAAAGAAACTCCTGTATATATTCAAACAACCATTTATGAGACCAGTAC  
AAACTACTCAAGAGGAAGATGGCTGTAGCTGCCGATTTCCAGAAGAAGAAGAAGGAGGA  
TGTGAACTGAGAGTGAAGTTCAGCAGGAGCGCAGACGCCCCGCGTACCAGCAGGGCCAG  
AACCAGCTCTATAACGAGCTCAATCTAGGACGAAGAGAGGAGTACGATGTTTTGGACAA  
GAGACGTGGCCGGGACCCTGAGATGGGGGAAAGCCGAGAAGGAAGAACCCTCAGGAAG  
GCCTGTACAATGAACTGCAGAAAGATAAGATGGCGGAGGCCTACAGTGAGATTGGGATG  
AAAGGCGAGCGCCGGAGGGGCAAGGGGCACGATGGCCTTTACCAGGGTCTCAGTACAGCC  
ACCAAGGACACCTACGACGCCCTTCACATGCAGGCCCTGCCCCCTCGCTAA

**Amino acid seq.**

MLLLVTSLLLCELPHPAFLLIPDIQMTQTTSSLSASLGDRVTISCRASQDISKYLNWYQQKP  
DGTVKLLIYHTSRLHSGVPSRFSGSGSDYSLTISNLEQEDIATYFCQQGNTLPYTFGGGT  
KLEITGSTSGSGKPGSGEGSTKGEVQLQESGPELVAPSQSLSVTCTVSGVSLPDYGVSWIRQ  
PPRKLEWLGVWVWSETTYNSALKSRLTIKDNSKSQVFLKMNSLQDDTAIYYCAKHYY  
YGGSYAMDYWGQTSVTVSSAAALSNSIMYFSHFVFPVFLPAKPTTTPAPRPPTPAPTASQ  
PLSLRPEACRPAAGGAVHTRGLDFACDIYIWAPLAGTCGVLLLSLVITLYCNHRNKRGRKK  
LLYIFKQPFMRPVQTTQEEDGCSCRFPEEEEGGCELRVKFSRSADAPAYQQGQNQLYNEL  
NLGRREEYDVLDRRRGRDPEMGGKPRRKNPQEGLYNELQKDKMAEAYSEIGMKGERRR  
GKGHDGLYQGLSTATKDTYDALHMQALPPR\*
